# Supplementary material for: Metabolomic signatures distinguish the impact of formula carbohydrates on disease outcome in a preterm piglet model of NEC
Source: PubMed Central journal article supplement (PMC6009052; doi:10.1186/s40168-018-0498-0), 2018-06-19

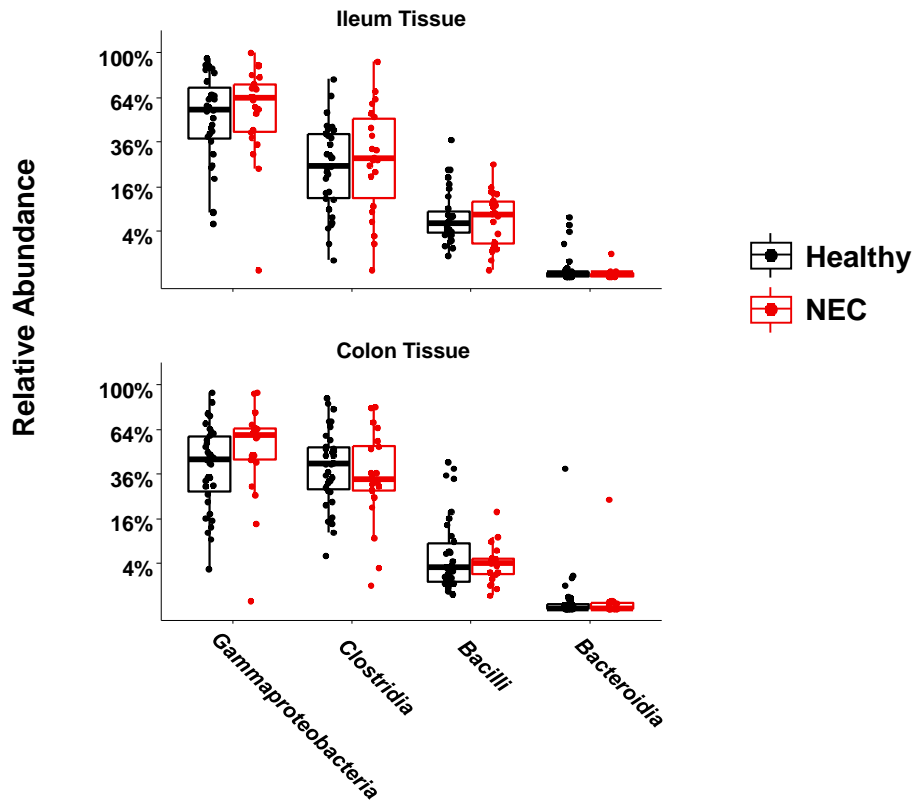

Supplement: 40168_2018_498_MOESM6_ESM.pdf [file 40168_2018_498_MOESM6_ESM.pdf]
